# Supplementary material for: Bonding dissimilar polymer networks in various manufacturing processes
Source: PubMed Central journal article supplement (PMC5829243; doi:10.1038/s41467-018-03269-x), 2018-02-27
Supplement: 41467_2018_3269_MOESM2_ESM.pdf [file 41467_2018_3269_MOESM2_ESM.pdf]

**Editorial Note:** This manuscript has been previously reviewed at another journal that is not operating a transparent peer review scheme. The manuscript was considered suitable for publication without further review at *Nature Communications*.
